# Supplementary material
Source: Springer Nature journal article supplement (https://www.springermedizin.de/resource/supplementary/13643_2012_50_MOESM14_ESM.pdf/9681370)
Supplement: MOESM14 [file 9681370]

**Adaptation Activity**-HIV information resources in community languages

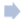

**Mechanism**-theorised as *'understanding'*

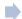

**Response**-immigrants comprehend and act on HIV messages – 'shared language'

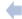

**Resistance** – inaccurate translation creates confusion and inaction

**Context**–language barriers in dominant language of destination country
